# Supplementary material for: Low methane emissions from a boreal wetland constructed on oil sand mine tailings
Source: Copernicus journal article supplement (doi:10.5194/bg-17-667-2020), 2020-02-10
Supplement: Supplementary file 1 [file bg-17-667-2020-supplement.pdf]

Supplement of Biogeosciences, 17, 667–682, 2020  
<https://doi.org/10.5194/bg-17-667-2020-supplement>  
© Author(s) 2020. This work is distributed under  
the Creative Commons Attribution 4.0 License.

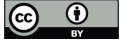

*Supplement of*

## **Low methane emissions from a boreal wetland constructed on oil sand mine tailings**

**M. Graham Clark et al.**

*Correspondence to:* M. Graham Clark ([dr.mg.clark@gmail.com](mailto:dr.mg.clark@gmail.com))

The copyright of individual parts of the supplement might differ from the CC BY 4.0 License.

## Supplementary information

Table S1: Published values for methane fluxes from sites with rewetted peatland soils, which also contain a reference to either an undisturbed or an unrestored site.

### Seasonal<sup>a</sup>

|                                                                 | Sub-site <sup>b</sup>                      | Years since rewetting | Flux <sup>c</sup><br>(mg CH <sub>4</sub> m <sup>-2</sup> h <sup>-1</sup> ) | Ratio of change <sup>d</sup> |
|-----------------------------------------------------------------|--------------------------------------------|-----------------------|----------------------------------------------------------------------------|------------------------------|
| <b>Boreal</b>                                                   |                                            |                       |                                                                            |                              |
| Boreal Plains, Canada<br>(Strack et al., 2014)                  | Unrestored – Bare Peat                     |                       | -0.1 <sup>c3</sup>                                                         | *                            |
|                                                                 | Rewetted – Dry                             | 4                     | <0.1 <sup>c3</sup>                                                         |                              |
|                                                                 | Rewetted – Wet                             | 4                     | 6 <sup>c3</sup>                                                            | 76.6                         |
| Bois-des-Bel<br>(Waddington and Day, 2007)                      | Unrestored - Cutover (year 1)              |                       | 0.3 <sup>c1,g</sup>                                                        | *                            |
|                                                                 | Unrestored - Cutover (year 2)              |                       | 0.1 <sup>c1,g</sup>                                                        | *                            |
|                                                                 | Unrestored - Cutover (year 3)              |                       | 0.3 <sup>c1,g</sup>                                                        | *                            |
|                                                                 | Rewetted (year 1)                          | 1                     | <0.1 <sup>c1,g</sup>                                                       | -0.9                         |
|                                                                 | Rewetted (year 2)                          | 2                     | 0.4 <sup>c1,g</sup>                                                        | 2.7                          |
|                                                                 | Rewetted (year 3)                          | 3                     | 1.4 <sup>c1,g</sup>                                                        | 3.6                          |
| Kihinö, Finland<br>(Tuittila et al., 2000)                      | Unrestored Tussock (year prior to wetting) |                       | 0.2 <sup>c1</sup>                                                          | *                            |
|                                                                 | Restored Tussock                           | 1                     | 0.75 <sup>c1,f</sup>                                                       | 2.8                          |
|                                                                 | Restored Tussock                           | 2                     | 2.5 <sup>c1,f</sup>                                                        | 11.5                         |
| Konilamminsuo mire (fen), Sweden<br>(Komulainen et al., 1998)   | Unrestored – Low watertable                |                       | <-0.1                                                                      | *                            |
|                                                                 | Rewetted – High watertable                 | 1                     | 1.1                                                                        | 132.8                        |
|                                                                 | Rewetted – Average watertable              | 1                     | 0.2                                                                        | 19.8                         |
| Multiple Sites, Finland<br>(Juottonen et al., 2012)             | Asusuo (Undisturbed)                       |                       | 5.8 <sup>c1</sup>                                                          |                              |
|                                                                 | Kallioneva (Undisturbed)                   |                       | 29.5 <sup>c1</sup>                                                         |                              |
|                                                                 | Hirsikangas (Undisturbed)                  |                       | 9.5 <sup>c1</sup>                                                          |                              |
|                                                                 | Mean Undisturbed                           |                       | 14.9 <sup>c1</sup>                                                         |                              |
|                                                                 | Murtsuo (Rewetted)                         | 11                    | 0.3 <sup>c1</sup>                                                          |                              |
|                                                                 | Konilamminsuo (Rewetted)                   | 12                    | 0.1 <sup>c1</sup>                                                          |                              |
|                                                                 | Vanneskorpi (Rewetted)                     | 10-11                 | 0.5 <sup>c1</sup>                                                          |                              |
| Mean Rewetted                                                   |                                            | 0.1 <sup>c1</sup>     | -1.0                                                                       |                              |
| Šumava National Park, Czech Republic<br>(Urbanová et al., 2012) | Undisturbed Bog – <i>Trichophorum</i>      |                       | 3.8                                                                        |                              |
|                                                                 | Undisturbed Bog – Shrub                    |                       | 3.0                                                                        |                              |
|                                                                 | Unrestored Bog – Shrub                     |                       | 2.2                                                                        | *                            |
|                                                                 | Unrestored Bog – <i>Molinia</i>            |                       | 0.4                                                                        |                              |
|                                                                 | Rewetted Bog – <i>Trichophorum</i>         | 1                     | 2.5                                                                        | 0.1                          |
|                                                                 | Rewetted Bog – Shrub Dominated             | 1                     | 0.4                                                                        | -0.8                         |

|                                                                 | <b>Sub-site<sup>b</sup></b>     | <b>Years since rewetting</b> | <b>Flux<sup>c</sup><br/>(mg CH<sub>4</sub> m<sup>-2</sup> h<sup>-1</sup>)</b> | <b>Ratio of change<sup>d</sup></b> |
|-----------------------------------------------------------------|---------------------------------|------------------------------|-------------------------------------------------------------------------------|------------------------------------|
| Viheriäisenneva mire (bog), Sweden<br>(Komulainen et al., 1998) | Unrestored – hollow/lawn        |                              | 0.3                                                                           | *                                  |
|                                                                 | Rewetted – hollow-/awn          | 1                            | 1.5                                                                           | 3.7                                |
|                                                                 | Rewetted – hummock/lawn         | 1                            | 0.3                                                                           | 0.1                                |
| <b><u>Temperate</u></b>                                         |                                 |                              |                                                                               |                                    |
| Burns Bog, BC, Canada<br>(Christen et al., 2016)                | Undisturbed                     | n/a                          | 2.4 <sup>c2</sup>                                                             |                                    |
|                                                                 | Drained-Sedge/ <i>Sphagnum</i>  |                              | 2.8 <sup>c2</sup>                                                             | *                                  |
|                                                                 | Rewetted-Sedge                  | 6                            | 4.5 <sup>c2</sup>                                                             | 0.6                                |
|                                                                 | Rewetted-Cleared                | 2                            | 1.6 <sup>c2</sup>                                                             | - 0.4                              |
| Donaumoos, Germany<br>(Wild et al., 2001)                       | Drained – Grassland             |                              | -0.01                                                                         | *                                  |
|                                                                 | Rewetted – <i>Typha</i>         | 0.2-1                        | 0.2                                                                           | 32.9                               |
|                                                                 | Rewetted – <i>Typha</i>         | 0.2-1                        | 1.3                                                                           | 131.9                              |
| Horstemeer, Netherlands<br>(Hendriks et al., 2007)              | Rewetted relatively dry regions | 10                           | 2.2 ± 0.2 <sup>c1</sup>                                                       | *                                  |
|                                                                 | Rewetted-annually saturated     | 10                           | 18.4 ± 2.9 <sup>c1</sup>                                                      | 7.3                                |

### ***Annual<sup>a</sup>***

|                                                          |                                          |             |                    |       |
|----------------------------------------------------------|------------------------------------------|-------------|--------------------|-------|
| <b><u>Boreal</u></b>                                     |                                          |             |                    |       |
| Ahlen-Falkenberger Moor, Germany<br>(Beetz et al., 2013) | Natural Wetland (year 1)                 |             | 0.7 <sup>c4</sup>  |       |
|                                                          | Natural Wetland (year 2)                 |             | 0.4 <sup>c4</sup>  |       |
|                                                          | Drained - Intensive Management (year 1)  |             | <0.1 <sup>c4</sup> | *     |
|                                                          | Drained - Intensive Management (year 2)  |             | <0.1 <sup>c4</sup> | *     |
|                                                          | Rewetted - Extensive Management (year 1) | 3           | 0.2 <sup>c4</sup>  | 9.5   |
|                                                          | Rewetted - Extensive Management (year 2) | 4           | <0.1 <sup>c4</sup> | 2.6   |
| <b><u>Temperate</u></b>                                  |                                          |             |                    |       |
| Ballacorick, Ireland<br>(Wilson et al., 2013)            | Rewetted – Bare Peat (relatively Dry)    | Mean of 7-9 | <0.1               | *     |
|                                                          | Rewetted – <i>Juncus/Spagnum</i>         | Mean of 7-9 | 1.2                | 72.1  |
|                                                          | Rewetted – <i>Sphagnum</i>               | Mean of 7-9 | 1.5                | 87.4  |
|                                                          | Rewetted – <i>Euiophorum</i>             | Mean of 7-9 | 0.8                | 46.3  |
| Glenvar, Ireland<br>(Renou-Wilson et al., 2016)          | Unrestored – Grazing allowed             |             | 0.2 <sup>c4</sup>  | *     |
|                                                          | Unrestored – No Grazing                  |             | 0.3 <sup>c4</sup>  | *     |
|                                                          | Rewetted – Grazing allowed               | 15-16       | 1.9 <sup>c4</sup>  | 6.8   |
|                                                          | Rewetted – No Grazing                    | 17-18       | 0.9 <sup>c4</sup>  | 2.0   |
| Himmelmoor, Germany<br>(Vanselow-Algan et al., 2015)     | Unrestored – Extraction site             |             | <0.1 <sup>c1</sup> | *     |
|                                                          | Restored Heath dominated                 | 3-30        | 7.2 <sup>c1</sup>  | 201.0 |
|                                                          | Restored Sphagnum dominated              | 3-30        | 11.4 <sup>c1</sup> | 315.0 |
|                                                          | Restored Purple moor grass dominated     | 3-30        | 17.0 <sup>c1</sup> | 470.1 |

|                                                      | <b>Sub-site<sup>b</sup></b>              | <b>Years since rewetting</b> | <b>Flux<sup>c</sup></b> | <b>Ratio of change<sup>d</sup></b> |
|------------------------------------------------------|------------------------------------------|------------------------------|-------------------------|------------------------------------|
| Horstermeer, Netherlands<br>(Hendriks et al., 2007)  | Rewetted – Relatively Dry                | 10                           | 2.3                     | *                                  |
|                                                      | Rewetted – Wet                           | 10                           | 18.4                    | 7.11                               |
|                                                      | Ditch                                    | 10                           | 9.1                     | 3.0                                |
| Schleswing-Holstein, Germany<br>(Poyda et al., 2016) | Drained – Arable land                    |                              | <0.1                    | *                                  |
|                                                      | Drained – Moist, agricultural production |                              | <0.1                    | -0.5                               |
|                                                      | Drained – Wet, agricultural production   |                              | 0.2                     | 6.6                                |
|                                                      | Rewetted                                 | Mean of 20-23                | 0.8                     | 30.1                               |

***Peak flux<sup>a</sup>***

|                                                |                                  |       |                  |       |
|------------------------------------------------|----------------------------------|-------|------------------|-------|
| <b><u>Boreal</u></b>                           |                                  |       |                  |       |
| Boreal Plains, Canada<br>(Strack et al., 2014) | Drained - Extraction             |       | -0.05            | *     |
|                                                | Rewetted                         | 4     | 16.4             | 350.9 |
| <b><u>Temperate</u></b>                        |                                  |       |                  |       |
| Turraun, Ireland<br>(Wilson et al., 2009)      | Unrestored                       | 0     | 0.1 <sup>e</sup> |       |
|                                                | Restored- <i>Typha</i>           | 10-14 | 16               | 159   |
|                                                | Restored- <i>Phalaris</i>        | 10-14 | 6 <sup>e</sup>   | 59    |
|                                                | Restored- <i>Eriophoum/Carex</i> | 10-14 | 1.8              | 17    |

- 5 a – Literature reported seasonal, annual fluxes, or maximum. Scaled to hourly fluxes over the study period for consistency of units used in this study.
- b – Sub-sites are labelled with either dominate vegetation, or treatment as worded within each paper.
- c – c1 designates mean, c2 designates median, c3 designates midpoint of the given range, c4 designates annual total divided by 8760 hours.
- d - % change is the difference between the rewetted site flux and the dry site flux divided by the absolute dry site flux. i.e. the effect of wetting on methane emissions. \*indicates which subsite was used for the dry site flux.
- 10 e – Values interpreted from figure 2 in Wilson et al. 2009.
- f – value interpreted from figure 2 in Tuttila et al 2000.
- g – spatially weighted mean flux from table 2 values in Waddington and Day 2007.

## References

- 15 Beetz, S., Liebersbach, H., Glatzel, S., Jurasinski, G., Buczko, U., Höper, H., 2013. Effects of land use intensity on the full greenhouse gas balance in an Atlantic peat bog. *Biogeosciences* 10, 1067–1082.
- Christen, A., Jassal, R.S., Black, T.A., Grant, N.J., Hawthorne, I., Johnson, M.S., Lee, S.-C., Merkens, M., 2016. Summertime greenhouse gas fluxes from an urban bog undergoing restoration through rewetting. *Mires Peat* 17, 1–24.
- Hendriks, D.M.D., van Huissteden, J., Dolman, a. J., van der Molen, M.K., 2007. The full greenhouse gas balance of an abandoned peat meadow. *Biogeosciences* 4, 277–316.
- 20 Juottonen, H., Hynninen, A., Nieminen, M., Tuomivirta, T.T., Tuittila, E., Nousiainen, H., Kell, D.K., 2012. Methane-Cycling Microbial Communities and Methane Emission in Natural and Restored Peatlands. *Appl. Environ. Microbiol.* 78, 6386–6389.
- Komulainen, V.M., Nykanen, H., Martikainen, P.J., Laine, J., 1998. Short-term effect of restoration on vegetation change and methane emissions from peatlands drained for forestry in southern Finland. *Can. J. For. Res.* 28, 402–411.
- 25 Poyda, A., Reinsch, T., Kluß, C., Loges, R., Taube, F., 2016. Greenhouse gas emissions from fen soils used for forage production in northern Germany. *Biogeosciences* 13, 5221–5244.
- Renou-Wilson, F., Müller, C., Moser, G., Wilson, D., 2016. To graze or not to graze? Four years greenhouse gas balances and vegetation composition from a drained and a rewetted organic soil under grassland. *Agric. Ecosyst. Environ.* 222, 156–170.
- 30 Strack, M., Keith, A.M., Xu, B., 2014. Growing season carbon dioxide and methane exchange at a restored peatland on the Western Boreal Plain. *Ecol. Eng.* 64, 231–239.
- Tuittila, E., Komulainen, V., Vasander, H., Nykanen, H., Martikainen, P.J., Laine, J., 2000. Methane dynamics of a restored cut-away peatland. *Glob. Chang. Biol.* 6, 569–581.
- Urbanová, Z., Pícek, T., Hájek, T., Buřková, I., 2012. Vegetation and carbon gas dynamics under a changed hydrological regime in central European peatlands. *Plant Ecology & Diversity*, 5(1), 89-103.
- 35 Vanselow-Algan, M., Schmidt, S.R., Greven, M., Fiencke, C., Kutzbach, L., Pfeiffer, E.M., 2015. High methane emissions dominated annual greenhouse gas balances 30 years after bog rewetting. *Biogeosciences* 12, 4361–4371.
- Waddington, J.M., Day, S.M., 2007. Methane emissions from a peatland following restoration. *J. Geophys. Res.* 112, 1–11.
- Wild, U., Kamp, T., Lenz, A., Heinz, S., 2001. Cultivation of *Typha* spp. in constructed wetlands for peatland restoration. 40 *Ecol. Eng.* 17, 49–54.
- Wilson, D., Alm, J., Laine, J., Byrne, K.A., Farrell, E.P., Tuittila, E.S., 2009. Rewetting of cutaway peatlands: Are we re-creating hot spots of methane emissions? *Restor. Ecol.* 17, 796–806.
- Wilson, D., Farrell, C., Mueller, C., Hepp, S., 2013. Rewetted industrial cutaway peatlands in western Ireland : a prime location for climate change mitigation? *Mires Peat* 11, 1–22.
